# Supplementary material for: Al3+ selective coumarin based reversible chemosensor: application in living cell imaging and as integrated molecular logic gate
Source: Royal Society of Chemistry journal article supplement (doi:10.1039/c4ra04318a), 2014-01-01
Supplement: c4ra04318a1.pdf [file c4ra04318a1.pdf]

## **Supporting Information**

### **Al<sup>3+</sup> selective coumarin based reversible chemosensor: application in living cell imaging and as integrated molecular logic gate**

**Deblina Sarkar,<sup>a</sup> Arindam Pramanik,<sup>b</sup> Sujan Biswas,<sup>a</sup> Parimal Karmakar<sup>b</sup> and Tapan Kumar Mondal<sup>a\*</sup>**

*a* Department of Chemistry, Jadavpur University, Kolkata-700032, India E-mail: [tkmondal@chemistry.jdvu.ac.in](mailto:tkmondal@chemistry.jdvu.ac.in)

*b* Department of Life Science and Biotechnology, Jadavpur University, Kolkata-700 032,

E-mail: [pkarmakar\\_28@yahoo.co.in](mailto:pkarmakar_28@yahoo.co.in) (P. Karmakar).

### **Contents**

**Fig. S1.** <sup>1</sup>H-NMR spectra of H<sub>2</sub>L (A) and H<sub>2</sub>L-Al<sup>3+</sup> (B) in CDCl<sub>3</sub>

**Fig. S2.** HRMS spectra of the receptor H<sub>2</sub>L

**Fig. S3.** HRMS spectra of the receptor H<sub>2</sub>L-Al<sup>3+</sup> complex

**Fig. S4.** UV-Vis spectra of chemosensor (HL) (10 μM) upon addition of 2 equivalent of various metal ions (100 μM)

**Fig. S5.** The visible change in colour of H<sub>2</sub>L in presence of Al<sup>3+</sup> compared to other metals

**Fig. S6.** Job's plot diagram of the receptor (H<sub>2</sub>L) for Al<sup>3+</sup>

**Fig. S7.** Determination of Limit Of Detection of the receptor (H<sub>2</sub>L) for Al<sup>3+</sup>

**Fig. S8.** Determination of binding constant of the receptor (H<sub>2</sub>L) for Al<sup>3+</sup>

**Fig. S9.** Change in emission intensity of chemosensor (H<sub>2</sub>L) upon addition of Al<sup>3+</sup> along with other metal ions

**Fig. S10.** Potential energy scan in singlet ground (S<sub>0</sub>) state of H<sub>2</sub>L by DFT/B3LYP/6-311G(d) method

**Fig. S11.** Contour plots of selected molecular orbitals of chemosensor (H<sub>2</sub>L)

**Fig. S12.** Contour plots of selected molecular orbitals of H<sub>2</sub>L-Al<sup>3+</sup>

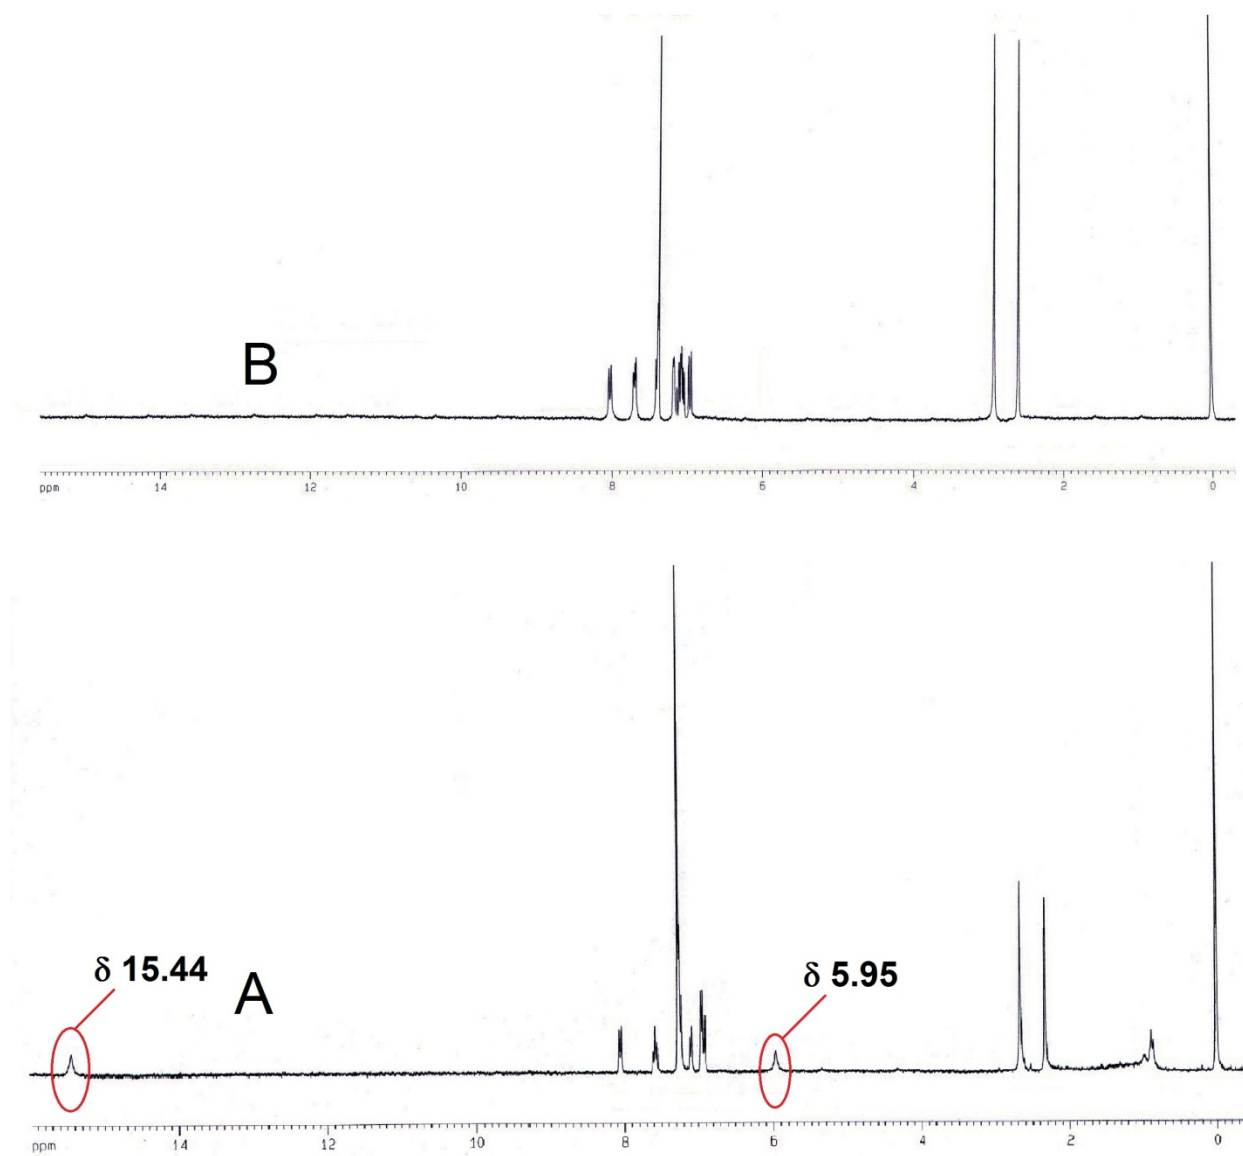

Fig. S1.  $^1\text{H}$ -NMR spectra of  $\text{H}_2\text{L}$  (A) and  $\text{H}_2\text{L}-\text{Al}^{3+}$  (B) in  $\text{CDCl}_3$

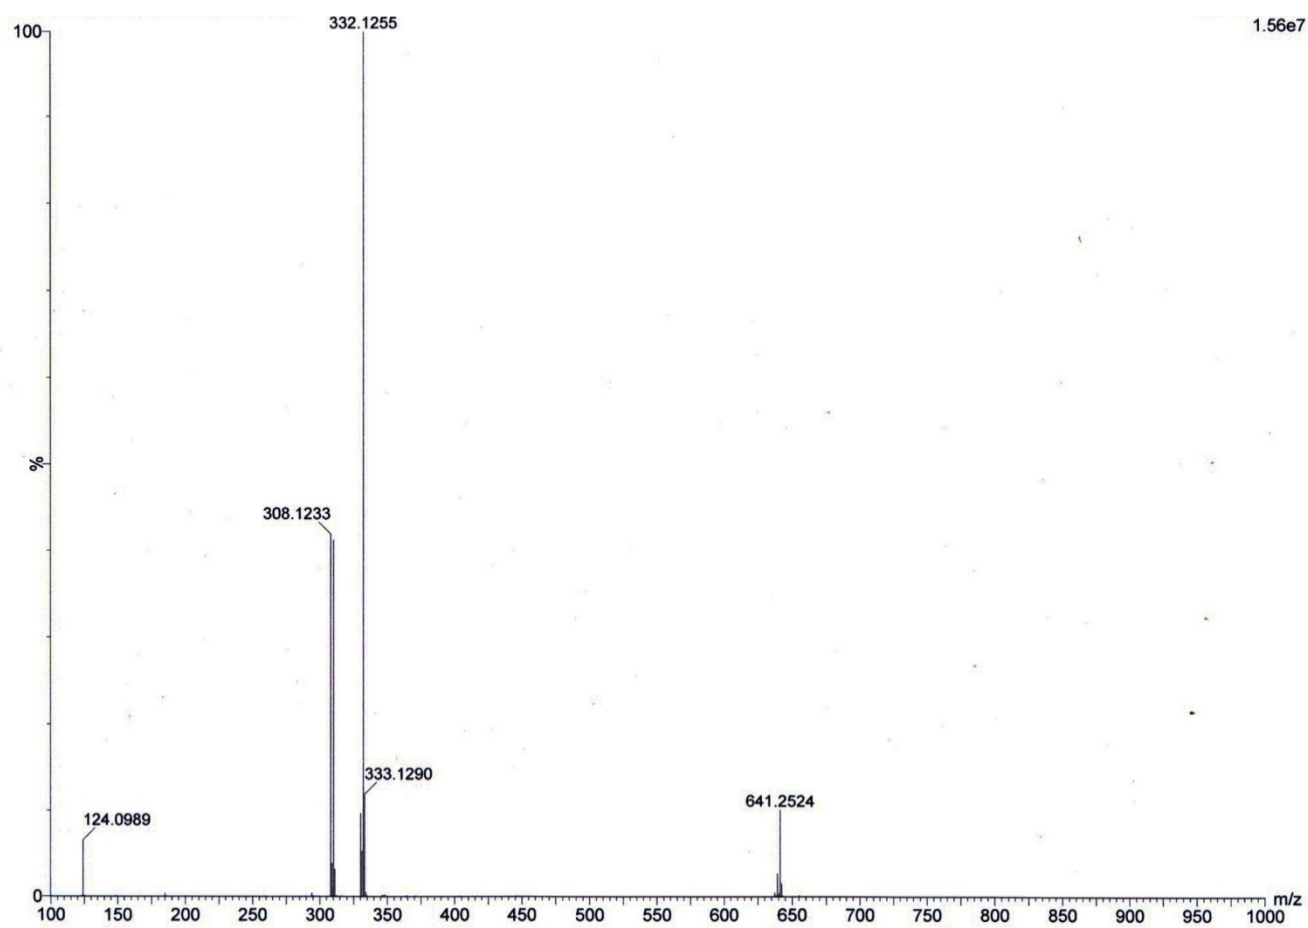

Fig. S2. HRMS spectra of the receptor H<sub>2</sub>L

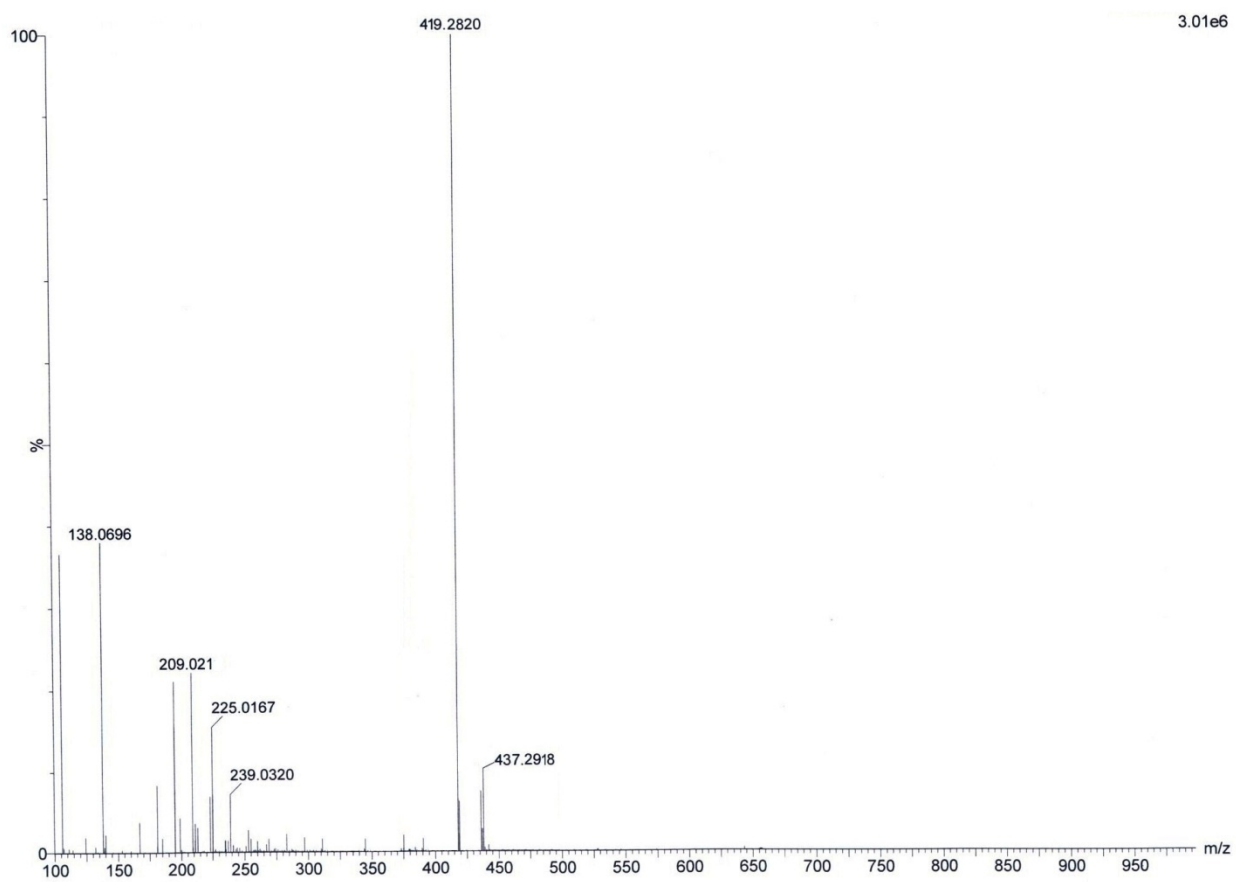

Fig. S3. HRMS spectra of the receptor  $H_2L-Al^{3+}$  complex

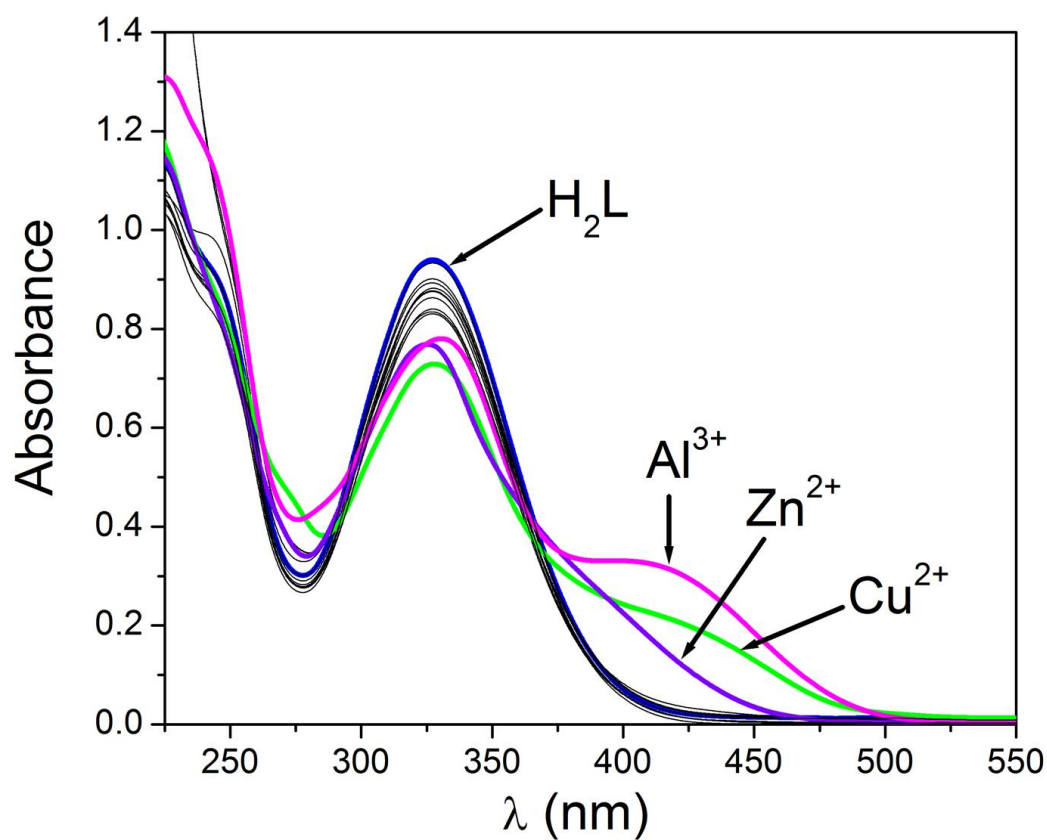

**Fig. S4.** UV-Vis spectra of chemosensor (HL) (10  $\mu\text{M}$ ) upon addition of 2 equivalent of various metal ions i.e,  $\text{Na}^+$ ,  $\text{K}^+$ ,  $\text{Ca}^{2+}$ ,  $\text{Mg}^{2+}$ ,  $\text{Mn}^{2+}$ ,  $\text{Fe}^{3+}$ ,  $\text{Cr}^{3+}$ ,  $\text{Co}^{2+}$ ,  $\text{Ni}^{2+}$ ,  $\text{Cu}^{2+}$ ,  $\text{Zn}^{2+}$ ,  $\text{Cd}^{2+}$  and  $\text{Hg}^{2+}$  (100  $\mu\text{M}$ )

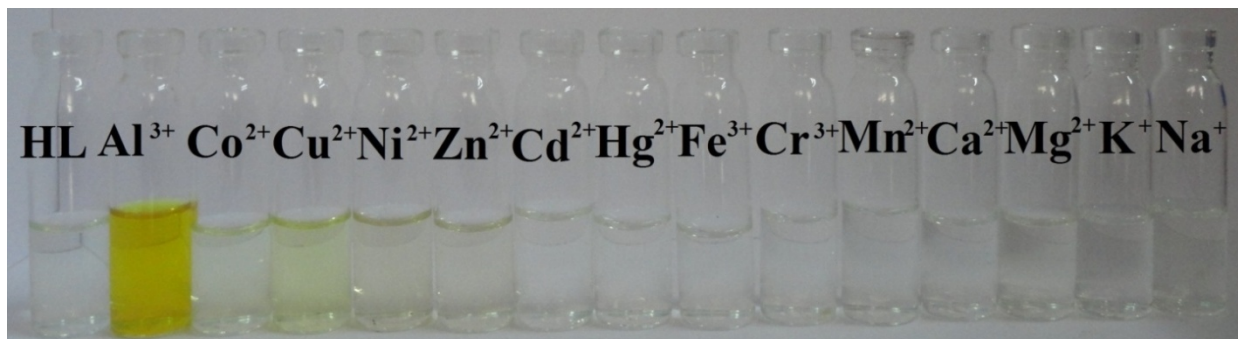

**Fig. S5.** Visual effect of addition of  $\text{Al}^{3+}$  to  $\text{H}_2\text{L}$  in comparison to other metals.

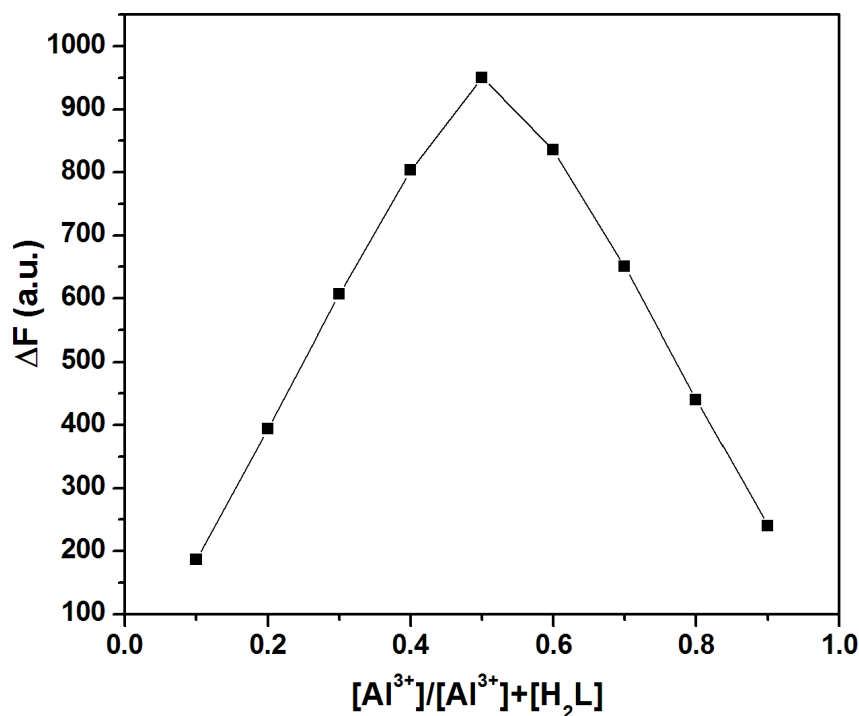

**Fig. S6.** Job's plot diagram of the receptor ( $H_2L$ ) for  $Al^{3+}$  (where  $\Delta F$  indicates the change of emission intensity at 398 nm)

#### Determination of detection limit:

The detection limit was calculated based on the fluorescence titration. To determine the S/N ratio, the emission intensity of  $H_2L$  without any analyte was measured by 10 times and the standard deviation of blank measurements was found to be  $1.370320319 \times 10^{-4}$ .

The limit of detection (LOD) of  $H_2L$  for  $Al^{3+}$  was determined from the following equation:  $LOD = K \times \sigma$  Where  $K = 3$  in this case and  $\sigma = (Sb_1)/(S)$ ;  $Sb_1$  is the standard deviation of the blank solution;  $S$  is the slope of the calibration curve.

From the graph we get slope = 104.52, and  $Sb_1$  value is  $1.370320319 \times 10^{-4}$  (**Fig. S8**). Thus using the formula we get the  $LOD = 0.393 \mu M$ .

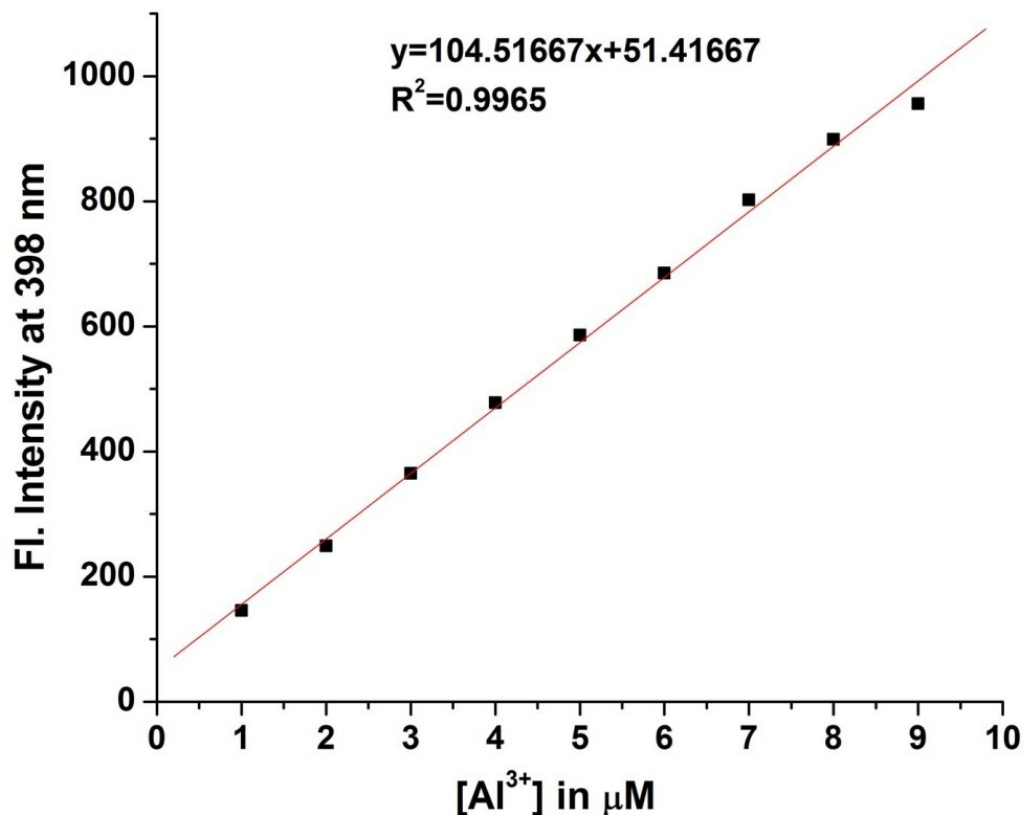

**Fig. S7.** Linear response curve of H<sub>2</sub>L at 398 nm depending on the Al<sup>3+</sup> concentration.

#### **Determination of binding constant from Fluorescence titration data:**

Binding constant was calculated according equation. The binding constant  $\beta$  was calculated following the equation stated below.

$$\text{Log } (F - F_{\min}) / (F_{\max} - F) = n \log [M^{n+}] + B$$

Here  $F_{\min}$ ,  $F$  and  $F_{\max}$  indicate the emission intensity in absence of, at intermediate and at infinite concentration of metal ion respectively.  $B = \log \beta$ , where  $\beta$  is the total binding constant and  $n$  is the number of Al<sup>3+</sup> bind per ligand. From the plot  $n = 1.17$  indicating 1:1 stoichiometry for the formed HL-Al<sup>3+</sup> complex (**Fig. S8**). From the intercept  $\beta$  is found to be  $1.48 \times 10^6$ .

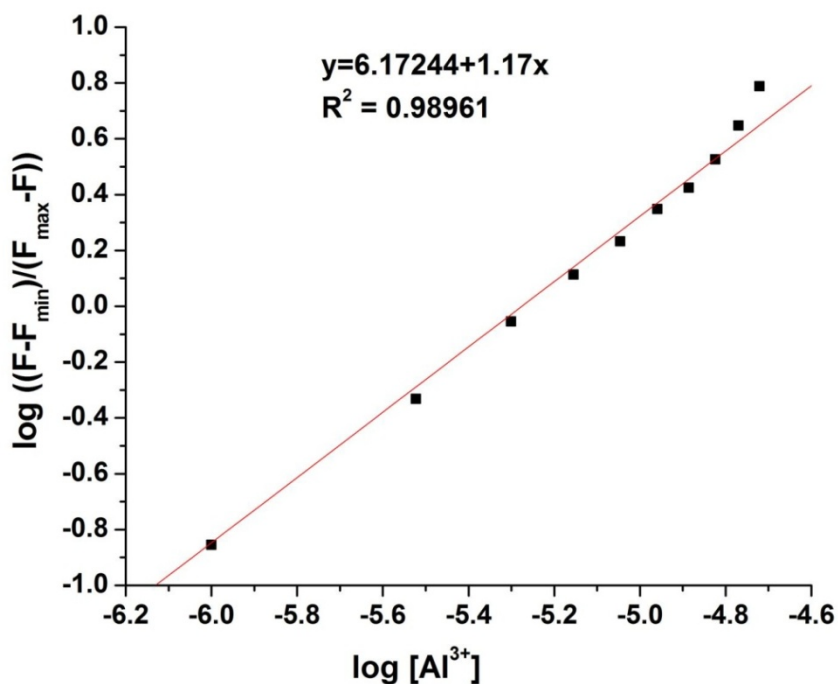

**Fig. S8.** Determination of binding constant of  $H_2L$  for  $Al^{3+}$  from fluorescent titration data

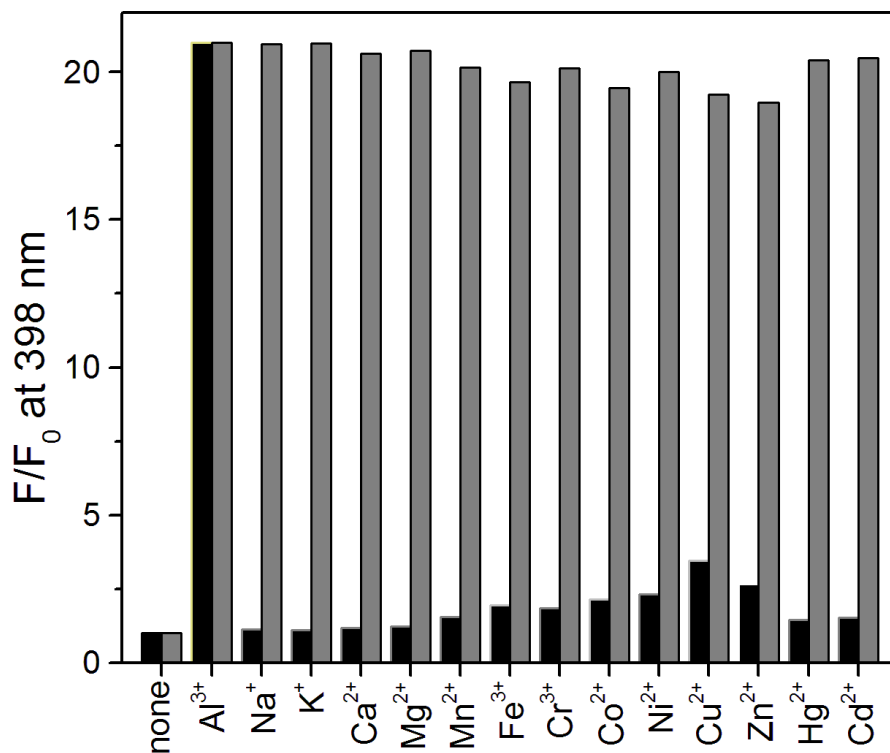

**Fig. S9.** Change in emission intensity of chemosensor ( $H_2L$ ) upon addition of 1 equivalent of  $Al^{3+}$  along with 2 equivalents of other metal ions to the receptor  $H_2L$

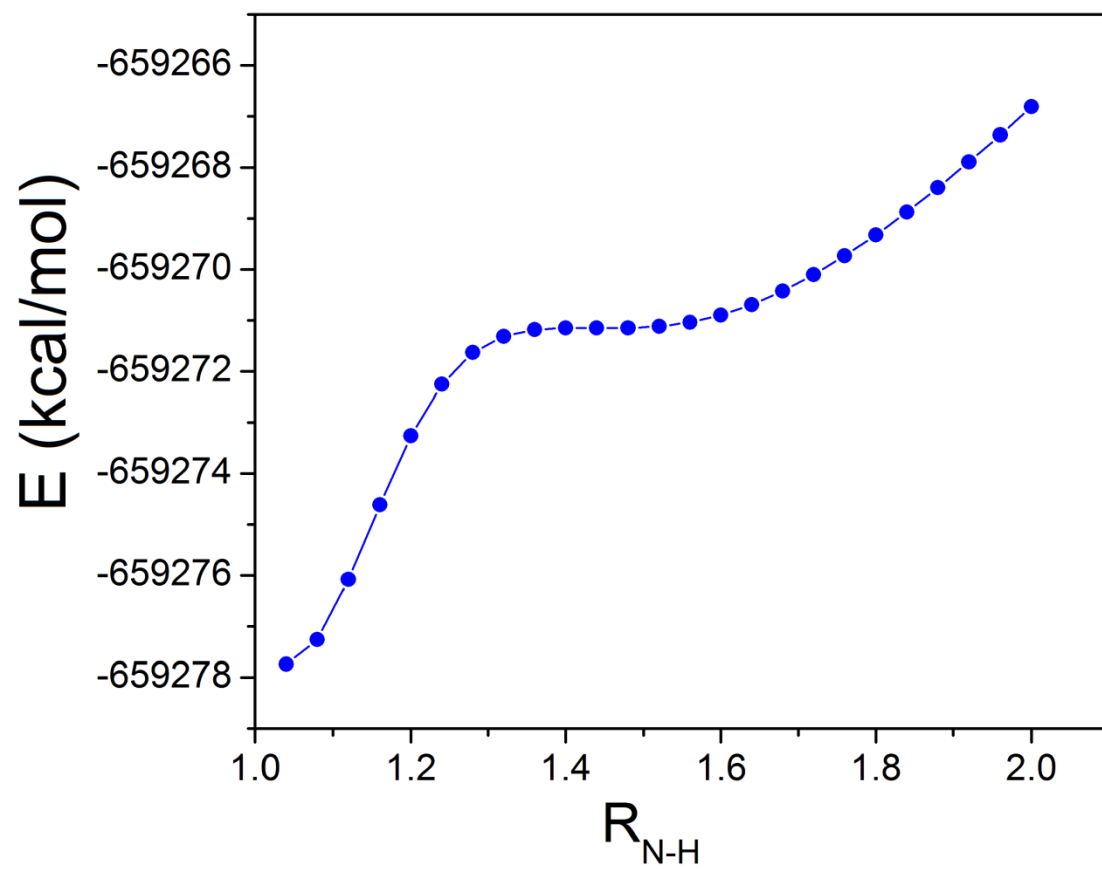

Fig. S10. Potential energy scan in singlet ground ( $S_0$ ) state of  $H_2L$  by DFT/B3LYP/6-311G(d) method

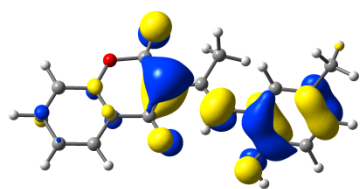

HOMO ( $E = -6.217$  eV)

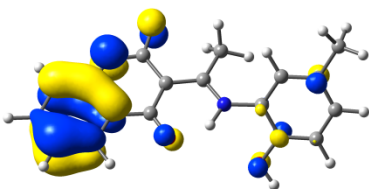

HOMO-1 ( $E = -6.618$  eV)

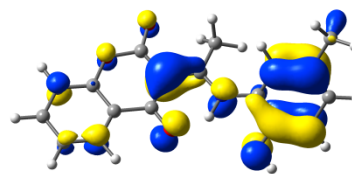

HOMO-2 ( $E = -6.793$  eV)

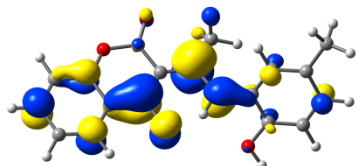

LUMO ( $E = -2.049$  eV)

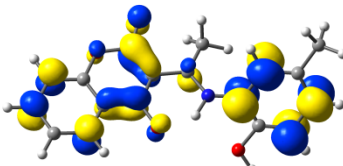

LUMO+1 ( $E = -1.075$  eV)

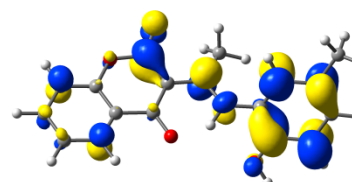

LUMO+2 ( $E = -0.759$  eV)

Fig. S11. Contour plots of selected molecular orbitals of chemosensor ( $H_2L$ )

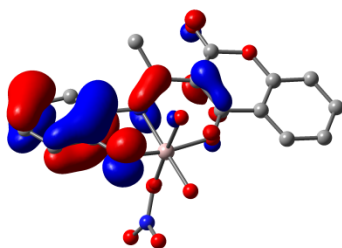

HOMO ( $E = -5.649$  eV)

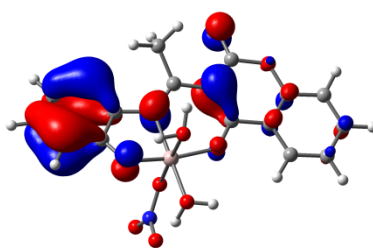

HOMO-1 ( $E = -6.401$  eV)

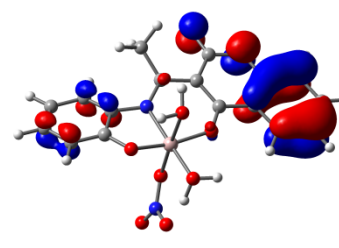

HOMO-2 ( $E = -6.879$  eV)

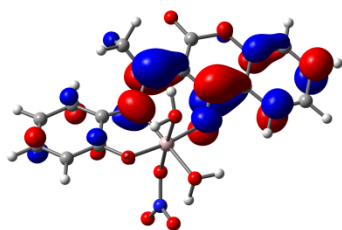

LUMO ( $E = -2.832$  eV)

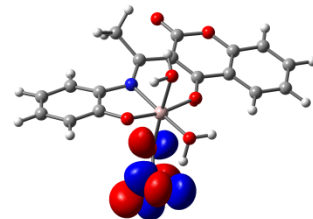

LUMO+1 ( $E = -1.316$  eV)

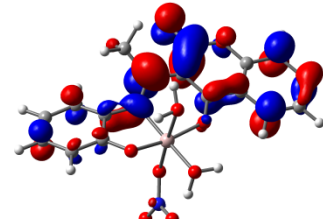

LUMO+2 ( $E = -1.090$  eV)

Fig. S12. Contour plots of selected molecular orbitals of  $H_2L-Al^{3+}$
